# Supplementary material for: Determination of birth-weight centile thresholds associated with adverse perinatal outcomes using population, customised, and Intergrowth charts: A Swedish population-based cohort study
Source: PLoS Med. 2019 Sep 20;16(9):e1002902. doi: 10.1371/journal.pmed.1002902 (PMC6754137; doi:10.1371/journal.pmed.1002902)
Supplement: S2 Table — (XLSX) [file pmed.1002902.s004.xlsx]

## Sheet: Sheet1
Table S2. Association of birthweight charts (fixed intervals of 5 centiles) and all caesarean section.
		Population centile			Customised centile			Intergrowth centile
	n	OR (95% CI)	p value	n	OR (95% CI)	p value	n	OR (95% CI)	p value
<5th centile	10543	1.19 (1.13 - 1.26)	<0.001	9978	1.22 (1.15 - 1.28)	<0.001	2836	1.98 (1.81 - 2.16)	<0.001
5-10 centile	10712	0.97 (0.91 - 1.02)	0.248995	11158	0.85 (0.81 - 0.91)	<0.001	3755	1.25 (1.14 - 1.36)	<0.001
10-15 centile	10617	0.89 (0.84 - 0.95)	<0.001	11753	0.81 (0.77 - 0.86)	<0.001	4229	1.02 (0.94 - 1.11)	0.636546
15-20 centile	10789	0.87 (0.82 - 0.92)	<0.001	12226	0.81 (0.77 - 0.86)	<0.001	4697	0.99 (0.92 - 1.08)	0.904918
20-25th centile	10625	0.94 (0.88 - 0.99)	0.0211658	12136	0.82 (0.78 - 0.87)	<0.001	5169	1.09 (1.01 - 1.17)	0.0330399
25-30th centile	10530	0.89 (0.84 - 0.94)	<0.001	12206	0.84 (0.80 - 0.89)	<0.001	5992	0.96 (0.89 - 1.03)	0.241092
30-35th centile	10637	0.92 (0.87 - 0.97)	0.00394893	12031	0.87 (0.82 - 0.92)	<0.001	6451	0.97 (0.90 - 1.04)	0.420381
35-40th centile	10730	0.95 (0.89 - 1.00)	0.0562296	11864	0.95 (0.90 - 1.00)	0.0599014	6770	1.00 (0.93 - 1.07)	0.929288
40-60th centile	42566	1		45043	1		34889	1
60-65th centile	10575	1.06 (1.00 - 1.12)	0.0435406	10337	1.05 (1.00 - 1.11)	0.06494	10961	1.02 (0.96 - 1.08)	0.481225
65-70th centile	10469	1.09 (1.03 - 1.15)	0.00268558	9990	1.18 (1.12 - 1.25)	<0.001	11842	1.07 (1.02 - 1.13)	0.0126167
70-75th centile	10625	1.20 (1.14 - 1.27)	<0.001	9624	1.23 (1.17 - 1.30)	<0.001	13001	1.12 (1.07 - 1.19)	<0.001
75-80th centile	10590	1.17 (1.11 - 1.23)	<0.001	9280	1.30 (1.23 - 1.37)	<0.001	14324	1.11 (1.05 - 1.17)	<0.001
80-85th centile	10532	1.31 (1.24 - 1.38)	<0.001	8829	1.48 (1.40 - 1.57)	<0.001	15881	1.13 (1.08 - 1.19)	<0.001
85-90th centile	10594	1.37 (1.30 - 1.44)	<0.001	8429	1.63 (1.54 - 1.72)	<0.001	18012	1.23 (1.18 - 1.29)	<0.001
90-95th centile	10485	1.58 (1.50 - 1.66)	<0.001	8094	1.88 (1.79 - 1.99)	<0.001	21944	1.33 (1.28 - 1.39)	<0.001
>95th centile	10482	2.18 (2.08 - 2.29)	<0.001	9123	3.00 (2.85 - 3.15)	<0.001	31348	1.80 (1.73 - 1.87)	<0.001
Abbreviations: CI (confidence interval), OR (odds ratio).
