# Supplementary material for: Determination of birth-weight centile thresholds associated with adverse perinatal outcomes using population, customised, and Intergrowth charts: A Swedish population-based cohort study
Source: PLoS Med. 2019 Sep 20;16(9):e1002902. doi: 10.1371/journal.pmed.1002902 (PMC6754137; doi:10.1371/journal.pmed.1002902)
Supplement: S9 Table — (XLSX) [file pmed.1002902.s011.xlsx]

## Sheet: Sheet1
Table S9. Association of birthweight charts (fixed intervals of 5 centiles) and perinatal mortality.
		Population centile			Customised centile			Intergrowth centile
	n	OR (95% CI)	p value	n	OR (95% CI)	p value	n	OR (95% CI)	p value
<5th centile	10543	4.47 (3.30 - 6.04)	<0.001	10715	5.78 (4.22 - 7.91)	<0.001	2836	10.74 (7.32 - 15.77)	<0.001
5-10 centile	10712	2.16 (1.50 - 3.12)	<0.001	11501	2.54 (1.74 - 3.71)	<0.001	3755	4.26 (2.68 - 6.78)	<0.001
10-15 centile	10617	1.59 (1.05 - 2.39)	0.02746	11999	1.26 (0.79 - 2.02)	0.337119	4229	2.47 (1.43 - 4.24)	0.00110986
15-20 centile	10789	0.88 (0.53 - 1.46)	0.613347	12178	1.47 (0.95 - 2.29)	0.0826319	4697	2.48 (1.48 - 4.18)	<0.001
20-25th centile	10625	0.79 (0.46 - 1.35)	0.391909	12128	1.49 (0.96 - 2.30)	0.0769458	5169	2.49 (1.51 - 4.11)	<0.001
25-30th centile	10530	1.00 (0.61 - 1.63)	0.993957	11114	0.95 (0.57 - 1.59)	0.842609	5992	1.94 (1.16 - 3.27)	0.0122247
30-35th centile	10637	0.79 (0.46 - 1.35)	0.389629	11764	1.39 (0.89 - 2.18)	0.150745	6451	1.81 (1.07 - 3.04)	0.0259679
35-40th centile	10730	1.67 (1.12 - 2.49)	0.0124861	11769	1.19 (0.74 - 1.93)	0.469467	6770	1.27 (0.71 - 2.27)	0.429064
40-60th centile	42566	1		44346	1		34889	1
60-65th centile	10575	0.84 (0.50 - 1.43)	0.526833	10164	0.93 (0.53 - 1.63)	0.809446	10961	1.90 (1.24 - 2.91)	0.00305903
65-70th centile	10469	0.45 (0.23 - 0.90)	0.0236162	9859	0.97 (0.55 - 1.69)	0.903659	11842	0.93 (0.55 - 1.58)	0.789381
70-75th centile	10625	0.44 (0.22 - 0.89)	0.0211418	9519	0.67 (0.34 - 1.30)	0.233405	13001	1.56 (1.01 - 2.39)	0.0437791
75-80th centile	10590	0.45 (0.22 - 0.89)	0.0216733	9149	0.62 (0.31 - 1.25)	0.1827	14324	0.98 (0.61 - 1.60)	0.944051
80-85th centile	10532	0.70 (0.40 - 1.23)	0.214756	8795	0.80 (0.42 - 1.51)	0.495255	15881	0.77 (0.46 - 1.28)	0.316234
85-90th centile	10594	0.59 (0.32 - 1.09)	0.0932296	8455	1.15 (0.66 - 2.00)	0.633649	18012	0.58 (0.34 - 0.99)	0.0469263
90-95th centile	10485	0.90 (0.54 - 1.50)	0.692461	8210	0.72 (0.36 - 1.43)	0.344103	21944	0.64 (0.39 - 1.04)	0.0721505
>95th centile	10482	1.00 (0.61 - 1.64)	0.99143	9436	1.84 (1.17 - 2.88)	0.00822307	31348	0.96 (0.65 - 1.40)	0.82033
Abbreviations: CI (confidence interval), OR (odds ratio).
